# Supplementary material for: Unusual reactivities of N-heterocyclic carbenes upon coordination to the platinum(ii)–dimethyl moiety
Source: Royal Society of Chemistry journal article supplement (doi:10.1039/b920482b), 2010-01-01
Supplement: b920482b.pdf [file b920482b.pdf]

## SUPPORTING INFORMATION

for

### **Unusual Reactivities of N-Heterocyclic Carbenes upon Coordination to the Platinum(II)-Dimethyl Moiety**

*George C. Fortman, Natalie M. Scott, Anthony Linden, Edwin D. Stevens, Reto Dorta,  
and Steven P. Nolan*

#### **TABLE OF CONTENTS**

|                                                                           |     |
|---------------------------------------------------------------------------|-----|
| Experimental Details.....                                                 | S2  |
| Selected bond lengths and angles for complexes <b>1-7</b> .....           | S7  |
| Summary of crystallographic data for complexes <b>1-7</b> .....           | S8  |
| <sup>1</sup> H and <sup>13</sup> C NMR spectra for all new compounds..... | S9  |
| SambVuca Output.....                                                      | S16 |

**General Considerations.** Unless stated otherwise all reactions were performed in an MBraun drybox or under Schlenk techniques. Solvents were obtained from Sigma Aldrich and were dried and degassed as necessary utilizing conventional methods. (COD)PtMe<sub>2</sub> was obtained from Strem Chemicals and used as received. <sup>Me</sup>IMe,<sup>[1]</sup> <sup>Me</sup>IPr,<sup>[1]</sup> ICy,<sup>[2]</sup> IMes,<sup>[2]</sup> IPr<sup>[3]</sup> and <sup>t</sup>Bu<sup>[4]</sup> were synthesized by literature methods. <sup>1</sup>H and <sup>13</sup>C NMR were obtained on either a Burker 400 MHz or a Bruker 300 MHz NMR spectrometer. Spectra were referenced to benzene at  $\delta$  7.16 (<sup>13</sup>C,  $\delta$  128.0), toluene at  $\delta$  2.04, or THF-d<sub>8</sub> at  $\delta$  3.58 (<sup>13</sup>C,  $\delta$  67.6) ppm. Elemental Analyses were performed at the Universität Zürich, Organisch-chemisches Institut.

**Synthesis of *cis*-Pt(<sup>Me</sup>IMe)<sub>2</sub>Me<sub>2</sub> (1).** Toluene (3 mL) was added to the solids (COD)PtMe<sub>2</sub> (100 mg, 0.3 mmol) and <sup>Me</sup>IMe (75.2 mg, 0.6 mmol) in a reaction vial. The resulting solution was stirred for 20 minutes, and then the volatiles were removed in vacuo, yielding a white solid. The compound was washed with pentane (3 x 2 mL), affording 131 mg (92 %) of the desired complex. X-ray quality crystals were obtained by slow evaporation of a saturated CH<sub>2</sub>Cl<sub>2</sub>/pentane solution at room temperature. Anal. Calcd for C<sub>16</sub>H<sub>30</sub>N<sub>4</sub>Pt (MW 473.53): C, 40.58; H, 6.39; N, 11.83. Found: C, 40.72; H, 6.16; N, 11.89. <sup>1</sup>H NMR (C<sub>6</sub>D<sub>6</sub>, 400 MHz,  $\delta$ ): 3.53 (s, 12H, N(1,3)-CH<sub>3</sub>), 1.45 (s, 12H, C(4,5)-CH<sub>3</sub>), 1.08 (s, 6H, <sup>2</sup>J<sub>Pt</sub> = 65.1 Hz, CH<sub>3</sub>). <sup>13</sup>C NMR (C<sub>6</sub>D<sub>6</sub>, 400 MHz,  $\delta$ ): 187.3 (s, N-C-N), 122.6 (s, C(4,5)), 34.1 (s, <sup>3</sup>J<sub>Pt</sub> = 47.2 Hz, N(1,3)-CH<sub>3</sub>), 9.06 (s, C(4,5)-CH<sub>3</sub>), -7.76 (s, <sup>1</sup>J<sub>Pt</sub> = 553.9 Hz, CH<sub>3</sub>).

**Synthesis of *cis*-Pt(ICy)<sub>2</sub>Me<sub>2</sub> (2).** Benzene (25mL) was added to the solids (COD)PtMe<sub>2</sub> (200 mg, 0.6 mmol) and ICy (365 mg, 1.2 mmol) in a reaction vial. The resulting solution was stirred for 1 hour, and then the volatiles were removed in vacuo, yielding a white solid. The compound was washed with pentane (3 x 5 mL), affording 414 mg (85 %) of the desired complex. X-ray quality crystals were obtained by slow evaporation of a saturated CH<sub>2</sub>Cl<sub>2</sub>/pentane solution at room temperature. Anal. Calcd for C<sub>32</sub>H<sub>54</sub>N<sub>4</sub>Pt (MW 689.90): C, 55.71; H, 7.89; N, 8.12. Found: C, 56.28 ; H, 7.67 ; N, 8.13. <sup>1</sup>H NMR (C<sub>6</sub>D<sub>6</sub>, 400 MHz,  $\delta$ ): 6.50 (s, 4H, <sup>4</sup>J<sub>Pt</sub> = 6.7 Hz. NCH=CHN), 5.37 (m, 4H, ICy-CH), 2.15

(m, 4H, *p*-ICy-CH<sub>2</sub>), 1.82 (m, 4H, *p*-ICy-CH<sub>2</sub>), ( 1.63 – 0.94 (m, 36H, *m/o*-ICy-CH<sub>2</sub>), 0.89 (s, 6H, <sup>2</sup>J<sub>Pt</sub> = 65.9 Hz, CH<sub>3</sub>). <sup>13</sup>C NMR (CD<sub>2</sub>Cl<sub>2</sub>, 400 MHz, δ): 185.55 (s, <sup>1</sup>J<sub>CPT</sub> = 1700.56Hz, N-C-N), 116.29 (s, <sup>3</sup>J<sub>CPT</sub> = 44.0 Hz, NHC=CHN), 52.58 (s, SIPr-NCH<sub>2</sub>CH<sub>2</sub>N), 28.67 (s, SIPr-CH), 25.42 (s, SIPr-CH<sub>3</sub>) 24.81 (s, SIPr-CH<sub>3</sub>), -8.36 (s, <sup>1</sup>J<sub>CPT</sub> = 1104.4 Hz, CH<sub>3</sub>).

**Synthesis of *cis*-Pt(<sup>Me</sup>IPr)<sub>2</sub>Me<sub>2</sub> (3).** Toluene (10 mL) was added to the solids (COD)PtMe<sub>2</sub> (100 mg, 0.30 mmol) and <sup>Me</sup>IPr (108.2 mg, 0.60 mmol) in a reaction vial. The resulting solution was stirred for 1 h, and then the volatiles were removed in vacuo, yielding a light cream colored solid. The compound was washed with pentane (3 x 5 mL), affording 185.4 mg (89 %) of the desired complex. X-ray quality crystals were obtained by slow evaporation of a saturated CH<sub>2</sub>Cl<sub>2</sub>/pentane solution at room temperature. Anal. Calcd for C<sub>24</sub>H<sub>46</sub>N<sub>4</sub>Pt (MW 585.34): C, 49.21; H, 7.92; N, 9.57. Found: C, 49.49; H, 7.88; N, 9.67. <sup>1</sup>H NMR (tol-d<sup>8</sup>, 400 MHz, δ): 6.36 (s, 4H, sept, *J* = 7.21 Hz, CH(CH<sub>3</sub>)<sub>2</sub>), 1.78 (s, 12H, s, C(4,5)-CH<sub>3</sub>), 1.38 (d, 12H, *J* = 7.13 Hz, CH(CH<sub>3</sub>)<sub>2</sub>), 1.02 (d, 12H, *J* = 7.26 Hz, CH(CH<sub>3</sub>)<sub>2</sub>), 1.00 (s, 6H, <sup>2</sup>J<sub>Pt</sub> = 65.6 Hz, Pt-CH<sub>3</sub>). <sup>13</sup>C NMR (tol-d<sub>8</sub>, 400 MHz, δ): 188.2 (s, N-C-N), 122.8 (s, <sup>3</sup>J<sub>Pt</sub> = 17.5 Hz C(4,5)), 51.3 (s, <sup>3</sup>J<sub>Pt</sub> = 52.8 Hz, CH(CH<sub>3</sub>)<sub>2</sub>), 22.6 (s, CH(CH<sub>3</sub>)<sub>2</sub>), 20.4 (s, CH(CH<sub>3</sub>)<sub>2</sub>) 10.2 (s, C(4,5)-CH<sub>3</sub>), -7.75 (s, Pt-CH<sub>3</sub>).

**Synthesis of *cis*-Pt(IMes)<sub>2</sub>Me<sub>2</sub> (4).**<sup>[5]</sup> Benzene (25mL) was added to the solids (COD)PtMe<sub>2</sub> (200 mg, 0.6 mmol) and IMes (365 mg, 1.2 mmol) in a Schenk flask. The resulting colourless solution was stirred for 10 minutes, and then the volatiles were removed in vacuo, yielding a white solid. The compound was washed with pentane (3 x 5 mL), affording 380 mg (76 %) of the desired complex. X-ray quality crystals were obtained by slow evaporation of a saturated benzene/Et<sub>2</sub>O solution at room temperature. Anal. Calcd for C<sub>44</sub>H<sub>54</sub>N<sub>4</sub>Pt (MW 833): C, 63.37; H, 6.53; N, 6.72. Found: C, 63.75 ; H, 6.72 ; N, 6.67 . <sup>1</sup>H NMR (C<sub>6</sub>D<sub>6</sub>, 400 MHz, δ): 6.68 (s, 4H, IMes-CH-Ar), 6.52 (s, 4H, IMes-CH-Ar), 6.13 (s, 4H, NCH=CHN), 2.38 (s, 12H, IMes-CH<sub>3</sub>), 2.22 (s, 12H, IMes-CH<sub>3</sub>), 1.87 (s, IMes-CH<sub>3</sub>), 0.39 (s, 6H, <sup>2</sup>J<sub>Pt</sub> = 68.1 Hz , Me). <sup>13</sup>C NMR (C<sub>6</sub>D<sub>6</sub>, 400 MHz, δ): 193.1 (s,N-C-N), 139.2 (s, SIPr-C), 136.8 (s, SIPr-C), 136.3 (s, SIPr-C), 135.8 (s,

SIPr-C), 130.23 (s, SIPr-C) 129.3 (s, overlapping with C<sub>6</sub>D<sub>6</sub>, SIPr-C), 123.3 (s, SIPr-NCH<sub>2</sub>CH<sub>2</sub>N), 21.6 (s, SIPr-CH), 20.4 (s, SIPr-CH<sub>3</sub>), -0.03 (s, Pt-CH<sub>3</sub>).

**Synthesis of Pt(IMes)(IMes')Me (5).**<sup>[5]</sup> Toluene (10 mL) was added to the solids (COD)PtMe<sub>2</sub> (50.0 mg, 0.15 mmol) and IMes (91.4 mg, 0.30 mmol) in a Schlenk flask. The sealed flask was removed from the glove box and attached to a Schlenk line under argon. The clear colorless solution was heated with stirring for 16 hr at 60 °C. The final color of the solution was light yellow. The solvent was removed in vacuo and washed with cold pentane (3 x 2 mL) followed by one wash with cold toluene (1 mL) to yield 46.2 mg (46 %) of an off white colored powder. X-ray quality crystals were obtained by slow evaporation of a saturated benzene/Et<sub>2</sub>O solution at room temperature. Anal. Calcd for C<sub>43</sub>H<sub>50</sub>N<sub>4</sub>Pt (MW 817.96) C, 63.14; H, 6.16; N, 6.85. Found: C, 63.57; H, 6.34; N, 6.34. <sup>1</sup>H NMR (C<sub>6</sub>D<sub>6</sub>, 400 MHz, δ): 7.00 (s, Mes-CH); 6.76 (s, 1H, Mes-CH); 6.70 (s, 1H, Mes-CH); 6.64 (s, 1H, Mes-CH); 6.60 (s, 1H, Mes-CH); 6.57 (s, 2H, CH=CH) 6.55 (s, 1H, Mes-CH); 6.47 (s, 1H, Mes-CH); 6.15 (s, 1H, Mes-CH); 6.09 (d, 1H); 6.00 (d, 1H, J = 2.2 Hz); 2.59 (s, 3H, Mes-CH<sub>3</sub>); 2.40 (s, 3H, Mes-CH<sub>3</sub>); 2.25 (s, 3H, Mes-CH<sub>3</sub>); 2.23 (s, 6H, Mes-CH<sub>3</sub>); 2.22 (s, 2H, Pt-CH<sub>2</sub>); 2.15 (s, 3H, Mes-CH<sub>3</sub>); 1.97 (s, 3H, Mes-CH<sub>3</sub>); 1.92 (s, 3H, Mes-CH<sub>3</sub>); 1.83 (s, 3H, Mes-CH<sub>3</sub>); 1.39 (s, 3H, Mes-CH<sub>3</sub>); 0.66 (s, 3H, <sup>2</sup>J<sub>Pt</sub> = 70.0 Hz, Pt-Me). <sup>13</sup>C NMR (C<sub>6</sub>D<sub>6</sub>, 400 MHz, δ): 193.7 (s, <sup>1</sup>J<sub>Pt</sub> = 887.7 Hz, N-C-N), 188.1 (s, <sup>1</sup>J<sub>Pt</sub> = 945.08 Hz, N-C-N) 138.89 (s, Mes-C), 138.72 (s, Mes-C), 138.33 (s, Mes-C), 138.13 (s, Mes-C), 137.72 (s, Mes-C), 136.95 (s, Mes-C), 136.58 (s, Mes-C), 136.42 (s, Mes-C), 136.26 (s, Mes-C), 135.60 (s, Mes-C), 134.05 (s, Mes-C), 133.98 (s, Mes-C), 130.85 (s, Mes-C), 130.05 (s, Mes-C), 129.09 (s, Mes-C), 128.90 (s, Mes-C), 126.95 (s, Mes-C), 123.35 (s, NCH=CHN), 122.30 (s, NCH=CHN), 120.99 (s, NCH=CHN) 120.43 (s, NCH=CHN), 23.04 (s, Pt-CH<sub>2</sub>-Mes), 21.86 (s, Mes-CH<sub>3</sub>), 21.80 (s, Mes-CH<sub>3</sub>), 21.51 (s, Mes-CH<sub>3</sub>), 21.26 (s, Mes-CH<sub>3</sub>), 20.09 (s, Mes-CH<sub>3</sub>), 19.83 (s, Mes-CH<sub>3</sub>), 19.56 (s, Mes-CH<sub>3</sub>), 19.27 (s, Mes-CH<sub>3</sub>), 19.08 (s, Mes-CH<sub>3</sub>), 18.82 (s, Mes-CH<sub>3</sub>), -4.85 (s, Pt-Me).

**Synthesis of Pt(IPr)<sub>2</sub> (6).** Toluene (25mL) was added to the solids (COD)PtMe<sub>2</sub> (200 mg, 0.6 mmol) and IPr (466 mg, 1.2 mmol) in a Schlenk flask. The resulting yellow

solution was heated at 80 °C for 12 h, and then the volatiles were removed in vacuo, yielding a bright yellow solid. The compound was washed with pentane (3 x 5 mL), affording 390 mg (67 %) of the desired complex. X-ray quality crystals were obtained by slow evaporation of a saturated Et<sub>2</sub>O solution at room temperature. Anal. Calcd for C<sub>54</sub>H<sub>72</sub>N<sub>4</sub>Pt (MW 972.28): C, 66.71; H, 7.96; N, 5.76. Found: C, 66.65; H, 8.09; N, 5.92. <sup>1</sup>H NMR (C<sub>6</sub>D<sub>6</sub>, 400 MHz, δ): 7.31 (m, 4H, *p*-Ar-H), 7.09 (d, 8H, *J* = 7.6 Hz, *o*-Ar-H) 6.23 (s, 4H, C(4,5)-H), 2.94 (sept, 4H, *J* = 6.9 Hz, CH(CH<sub>3</sub>)<sub>2</sub>), 1.24 (d, 24H, *J* = 6.9 Hz, CH(CH<sub>3</sub>)<sub>2</sub>), 1.12 (d, 24H, *J* = 7.0 Hz, CH(CH<sub>3</sub>)<sub>2</sub>). <sup>13</sup>C NMR (C<sub>6</sub>D<sub>6</sub>, 400 MHz, δ): 198.3 (s, <sup>1</sup>J<sub>C<sub>Pt</sub></sub> = 1880 Hz, N-C-N), 146.27 (s, IPr-C), 139.43 (s, IPr-C), 129.03 (s, overlapping with C<sub>6</sub>D<sub>6</sub>, IPr-C), 123.79 (s, IPr-C), 121.59 (s, NCH=CHN), 29.10 (s, IPr-CH), 25.47 (s, IPr-CH<sub>3</sub>), 24.41 (s, IPr-CH<sub>3</sub>).

**Synthesis of Pt(*n*<sup>t</sup>Bu)(*a*<sup>t</sup>Bu)<sub>2</sub>Me<sub>2</sub> (7).** Et<sub>2</sub>O (10 mL) was added to the solids (COD)PtMe<sub>2</sub> (200 mg, 0.6 mmol) and <sup>t</sup>Bu (21.6 mg, 1.2 mmol) in a reaction vial. The resulting solution was stirred for 2 weeks or until an appearance of a white solid. The solution was decanted and the white precipitate was washed with Et<sub>2</sub>O (3 x 5 mL), affording 157 mg (51 % yield) of Pt(*n*<sup>t</sup>Bu)(*a*<sup>t</sup>Bu)<sub>2</sub>Me<sub>2</sub>. X-ray quality crystals were obtained by slow evaporation of a saturated CH<sub>2</sub>Cl<sub>2</sub>/Et<sub>2</sub>O solution at room temperature. Anal. Calcd for C<sub>24</sub>H<sub>46</sub>N<sub>4</sub>Pt (MW 585.74): C, 49.21; H, 7.92; N, 9.57. Found: C, 49.32 ; H, 7.66 ; N, 9.60. <sup>1</sup>H NMR (C<sub>6</sub>D<sub>6</sub>, 400 MHz, δ): 7.28 (d, 1H, <sup>4</sup>J<sub>H</sub> = 2.2; Hz, <sup>4</sup>J<sub>Pt</sub> = 7.2 Hz, C(2)-H), 6.82 (d, 1H, <sup>4</sup>J<sub>H</sub> = 2.2; <sup>3</sup>J<sub>Pt</sub> = 17.1 Hz, C(4)=CH) 6.77 (s, 2H, <sup>4</sup>J<sub>Pt</sub> = 6.1 Hz C(4,5)=CH), 1.97 (s, 18H, C(CH<sub>3</sub>)<sub>3</sub>), 1.70 (s, 9H, C(CH<sub>3</sub>)<sub>3</sub>), 1.10 (s, 3H, <sup>2</sup>J<sub>Pt</sub> = 67.0 Hz, CH<sub>3</sub>), 0.89 (s, 3H, <sup>2</sup>J<sub>Pt</sub> = 67.5 Hz, CH<sub>3</sub>), 0.87 (s, 9H, C(CH<sub>3</sub>)<sub>3</sub>). <sup>13</sup>C NMR (THF-d<sub>8</sub>, 400 MHz, δ): 191.8 (s, N-C-N), 165.2 (s, Pt-C=C), 125.9 (s, <sup>3</sup>J<sub>Pt</sub> = 19.6 Hz, N-C(H)-N), 124.7 (s, <sup>3</sup>J<sub>Pt</sub> = 59.4 Hz, C(H)=C-Pt), 117.4 (s, <sup>3</sup>J<sub>Pt</sub> = 27.6 Hz, C(4,5)-*n*ItBu), 59.1 (s, N-C(CH<sub>3</sub>)<sub>3</sub>), 58.9 (s, N-C(CH<sub>3</sub>)<sub>3</sub>), 56.5 (s, N-C(CH<sub>3</sub>)<sub>3</sub>), 32.3 (s, C(CH<sub>3</sub>)<sub>3</sub>), 31.1 (s, C(CH<sub>3</sub>)<sub>3</sub>), 30.3 (s, C(CH<sub>3</sub>)<sub>3</sub>), -5.89 (s, <sup>1</sup>J<sub>Pt</sub> = 604.2 Hz Pt-CH<sub>3</sub>), -9.05 (s, <sup>1</sup>J<sub>Pt</sub> = 616.2 Hz, Pt-CH<sub>3</sub>).

**Crystallographic Structure Determinations.** Single-crystal x-ray diffraction data for *cis*-Pt(<sup>Me</sup>Ime)<sub>2</sub>Me<sub>2</sub> (**1**) were measured using an Enraf-Nonius Kappa CCD 4-circle diffractometer. Data for the remaining complexes (**2-7**) were measured using a Bruker SMART 1K CCD 3-circle diffractometer. The crystals were cooled and maintained at the data collection temperature using a stream of cold N<sub>2</sub> gas. Integrated intensities were calculated from the raw detector data using the program *SAINTE*<sup>[6]</sup>. Empirical corrections for crystal absorption were calculated using the program *SADABS*<sup>[6]</sup>, and the structures were solved and refined using *SHELX97*<sup>[7]</sup>. *cis*-Pt(ICy)<sub>2</sub>Me<sub>2</sub>, **2**, which crystallizes in the noncentrosymmetric space group, Cc, has a Flack<sup>[8]</sup> parameter of 0.021(5). For each complex, all hydrogen atoms were located in difference Fourier maps. However, independent refinement yielded unrealistic geometries of some of the hydrogen atoms due to the influence of the highly absorbing Pt atom. Therefore, hydrogen positions were constrained to idealized geometry using a model in which the hydrogen atoms ride on the atoms to which they are attached. However, for the (IMes)(IMes\*)Pt(Me) complex, **5**, the hydrogen parameters on C42 were refined, since the constrained geometry may be inappropriate because of the C42-Pt1 interaction. To improve the initial convergence, ‘rigid bond’ restraints<sup>[9]</sup> on the anisotropic thermal displacement parameters were included in the refinements of complexes **2-7** with weighting factors of 0.007 Å<sup>2</sup>. Refinement of the thermal displacement parameters of the N3 atom of complex **5** yielded values corresponding to a non-positive definite tensor. To correct this result, isotropic restraints on the thermal parameters on N3 were imposed with a weighting factor of 0.005 Å<sup>2</sup>.

**Table S1.** Selected bond lengths and angles for complexes **1-7**

| <i>Complex</i> | Pt–NHC     | Pt–NHC                          | Pt–C                    | Pt–C     |
|----------------|------------|---------------------------------|-------------------------|----------|
| <b>1</b>       | 2.013(4)   | 2.027(5)                        | 2.090(6)                | 2.117(5) |
| <b>2</b>       | 2.032(3)   | 2.065(3)                        | 2.099(3)                | 2.107(3) |
| <b>3</b>       | 2.040(2)   | 2.053(2)                        | 2.093(2)                | 2.095(2) |
| <b>4</b>       | 2.043(3)   | 2.044(3)                        | 2.091(3)                | 2.093(3) |
| <b>5</b>       | 2.027(4)   | 2.053(4) <sup>[a]</sup>         | 2.105(4) <sup>[a]</sup> | 2.096(4) |
| <b>6</b>       | 1.968(6)   | 1.985(6)                        | ---                     | ---      |
| <b>7</b>       | 2.058(4)   | 2.074(4) <sup>[b]</sup>         | 2.079(4)                | 2.101(4) |
| <i>Complex</i> | NHC–Pt–NHC | NHC–Pt–C ( <i>cis</i> )         | C–Pt–C                  |          |
| <b>1</b>       | 92.8(2)    | 90.5(2), 91.2(2)                | 85.6(2)                 |          |
| <b>2</b>       | 94.0(1)    | 88.6(1), 93.3(1)                | 84.4(1)                 |          |
| <b>3</b>       | 96.7(1)    | 88.5(1), 90.6(1)                | 84.5(1)                 |          |
| <b>4</b>       | 113.0(1)   | 82.4(1), 83.6(1)                | 81.1(1)                 |          |
| <b>5</b>       | 108.4(2)   | 87.3(2), 79.8(2) <sup>[a]</sup> | 84.3(2) <sup>[a]</sup>  |          |
| <b>6</b>       | 178.3(2)   | ---                             | ---                     |          |
| <b>7</b>       | 104.3(2)   | 84.9(2), 83.9(2) <sup>[b]</sup> | 87.0(2)                 |          |

<sup>[a]</sup> Bond lengths and angles of cyclometallated IMes. <sup>[b]</sup> Bond lengths and angles of abnormally bound I<sup>t</sup>Bu.





***cis*-Pt(<sup>Me</sup>Pr)<sub>2</sub>Me<sub>2</sub> (3)**  
**<sup>1</sup>H NMR**

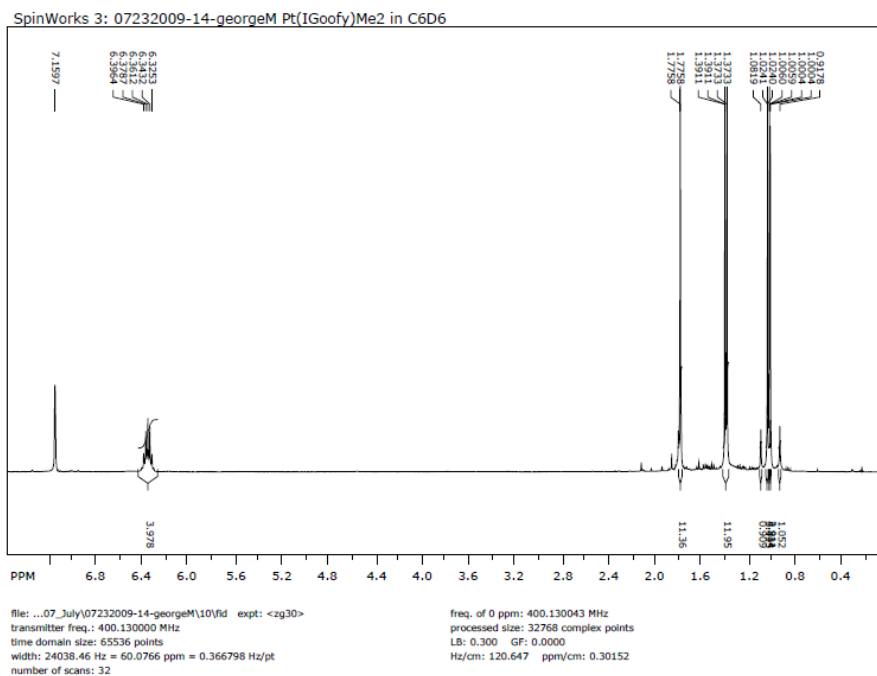

**<sup>13</sup>C NMR**

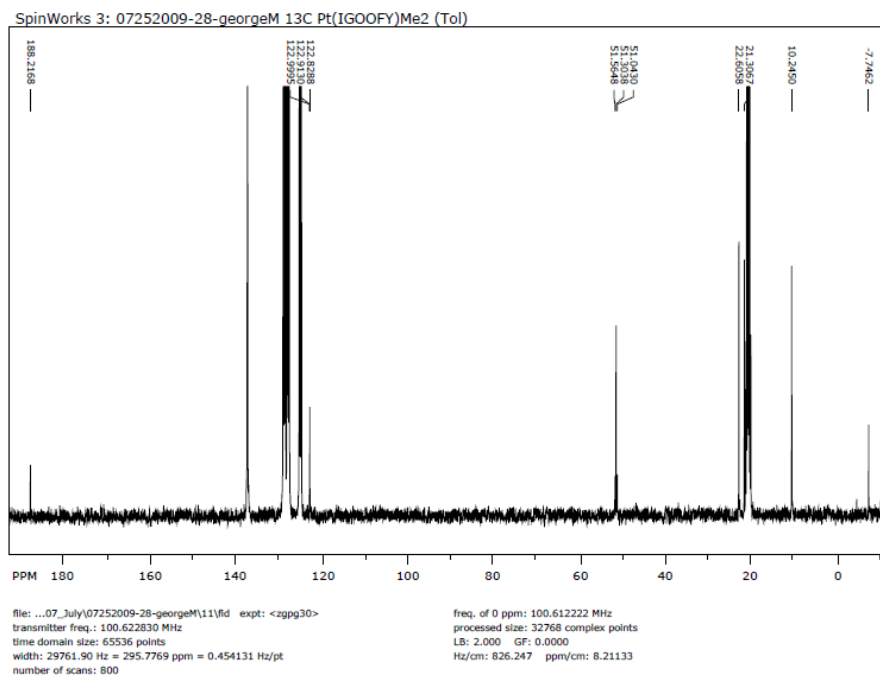

***cis*-Pt(<sup>Me</sup>IME)<sub>2</sub>Me<sub>2</sub>(1)**  
**<sup>1</sup>H NMR**

SpinWorks 3: 08062009-18-georgeM Pt(IME)<sub>2</sub>Me<sub>2</sub> in C<sub>6</sub>D<sub>6</sub>

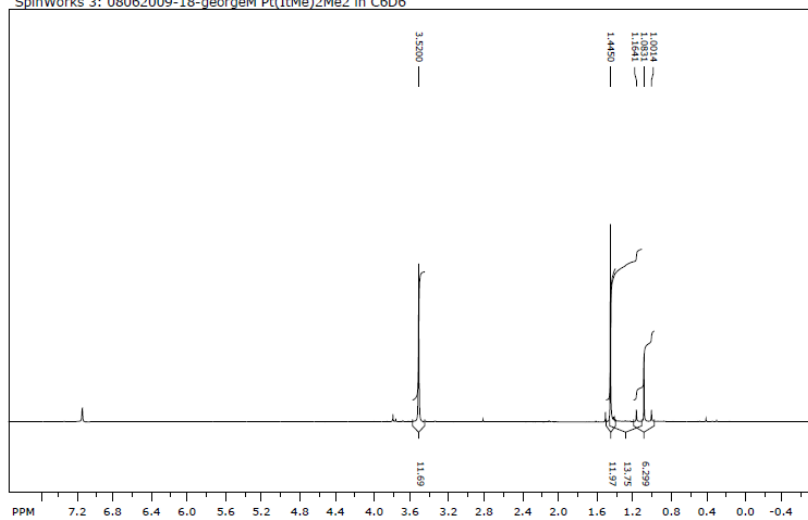

file: ...current\08062009-18-georgeM\10\fid exp: <zq30>  
transmitter freq.: 400.130000 MHz  
time domain size: 65536 points  
width: 24038.46 Hz = 60.0766 ppm = 0.366798 Hz/pt  
number of scans: 32

freq. of 0 ppm: 400.130043 MHz  
processed size: 32768 complex points  
LB: 0.300 GF: 0.0000  
Hz/cm: 139.246 ppm/cm: 0.34800

**<sup>13</sup>C NMR**

SpinWorks 3: 08062009-4-georgeM Pt(IME)<sub>2</sub>Me<sub>2</sub> (C<sub>6</sub>D<sub>6</sub>)

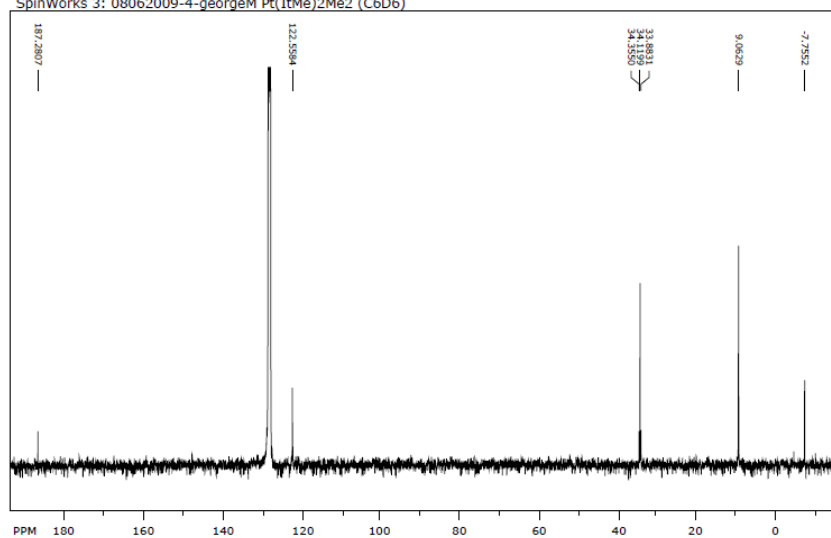

file: ...8\_August\08062009-4-georgeM\11\fid exp: <zpgg30>  
transmitter freq.: 100.622830 MHz  
time domain size: 65536 points  
width: 29761.90 Hz = 295.7769 ppm = 0.454131 Hz/pt  
number of scans: 800

freq. of 0 ppm: 100.612707 MHz  
processed size: 32768 complex points  
LB: 2.000 GF: 0.0000  
Hz/cm: 847.717 ppm/cm: 8.42470



***cis*-Pt(IMes)<sub>2</sub>Me<sub>2</sub> (4)**  
**<sup>1</sup>H NMR**

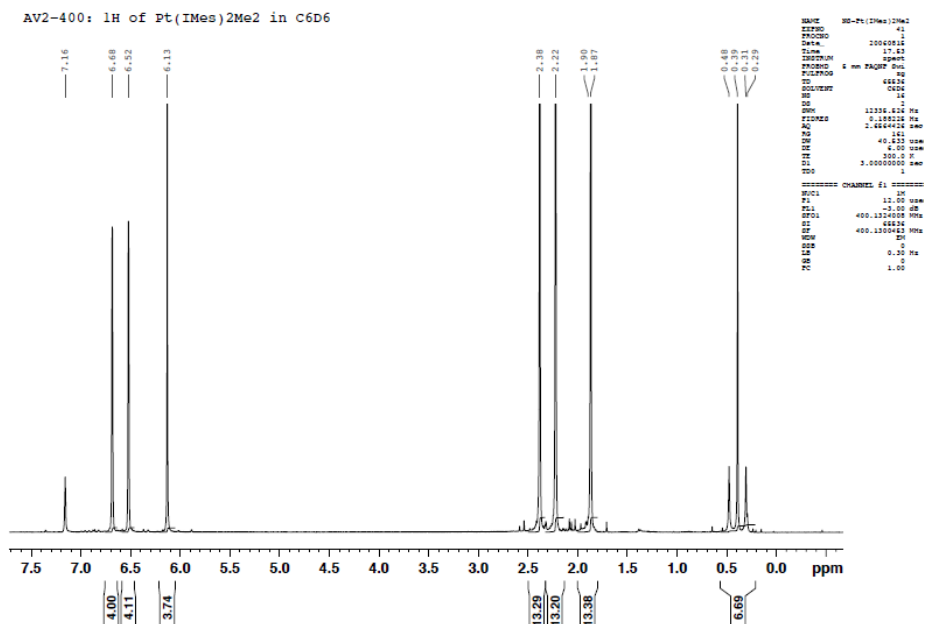

**<sup>13</sup>C NMR**

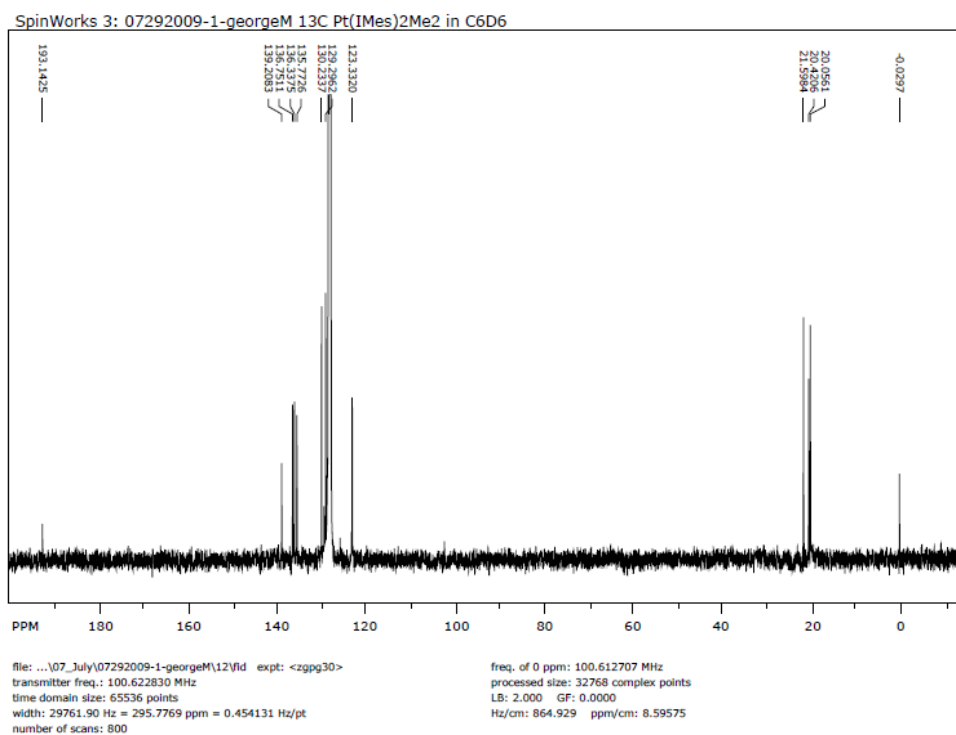

## Pt(IMes)(IMes')Me (5) <sup>1</sup>H NMR

SpinWorks 3: 07302009-22-georgeM Pt(IMes)(IMes\*)Me (C6D6)

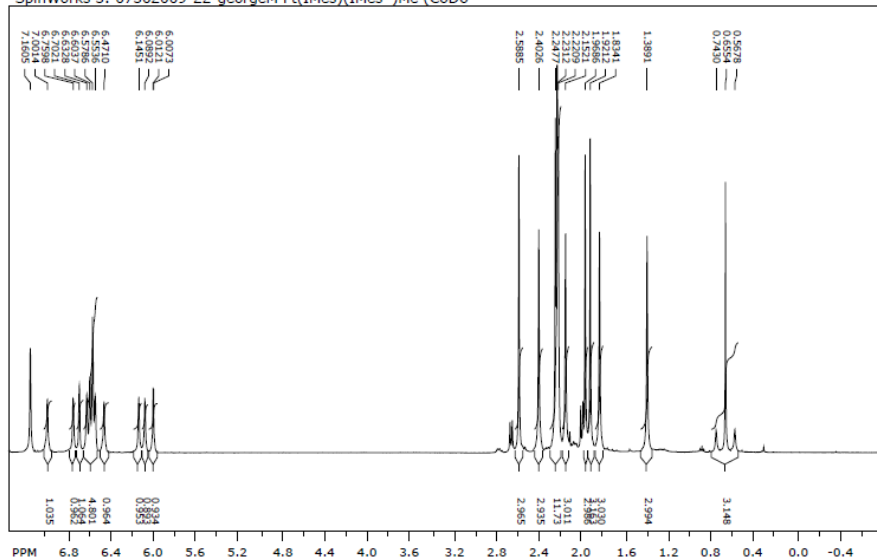

file: ...07\_July\07302009-22-georgeM\10\fid exp: <zg30>  
transmitter freq.: 400.130000 MHz  
time domain size: 65536 points  
width: 24038.46 Hz = 60.0766 ppm = 0.366798 Hz/pt  
number of scans: 32

freq. of 0 ppm: 400.130043 MHz  
processed size: 32768 complex points  
LB: 0.300 GF: 0.0000  
Hz/cm: 130.795 ppm/cm: 0.32688

## <sup>13</sup>C NMR

SpinWorks 3: Pt(IMes)(IMes\*)Me

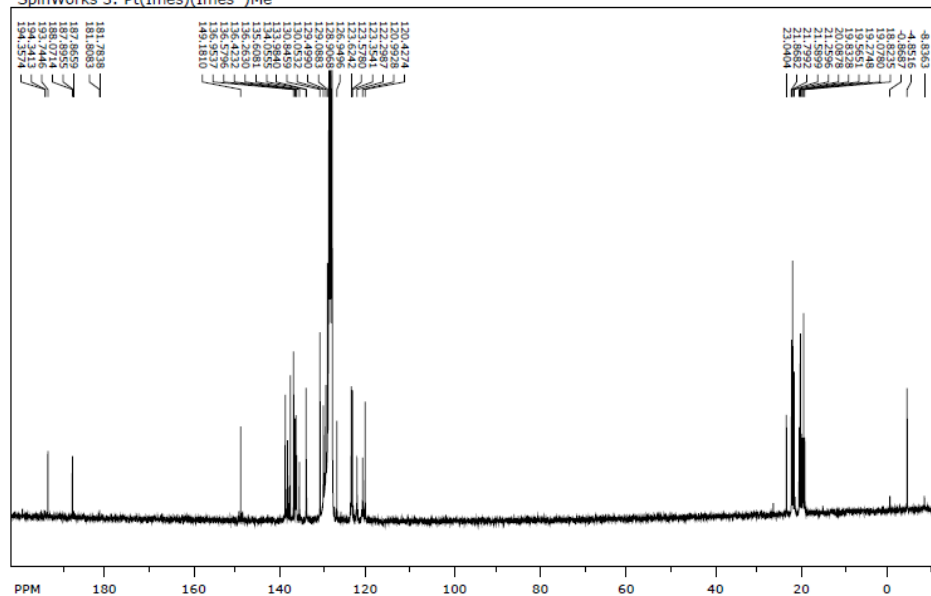

file: N:\ingrid\current\PtImes\1\fid exp: <zpgg30>  
transmitter freq.: 75.474918 MHz  
time domain size: 65536 points  
width: 18832.39 Hz = 249.5185 ppm = 0.287359 Hz/pt  
number of scans: 18432

freq. of 0 ppm: 75.467703 MHz  
processed size: 65536 complex points  
LB: 1.000 GF: 0.0000  
Hz/cm: 647.434 ppm/cm: 8.57814

### Pt(IPr)<sub>2</sub> (6) <sup>1</sup>H NMR

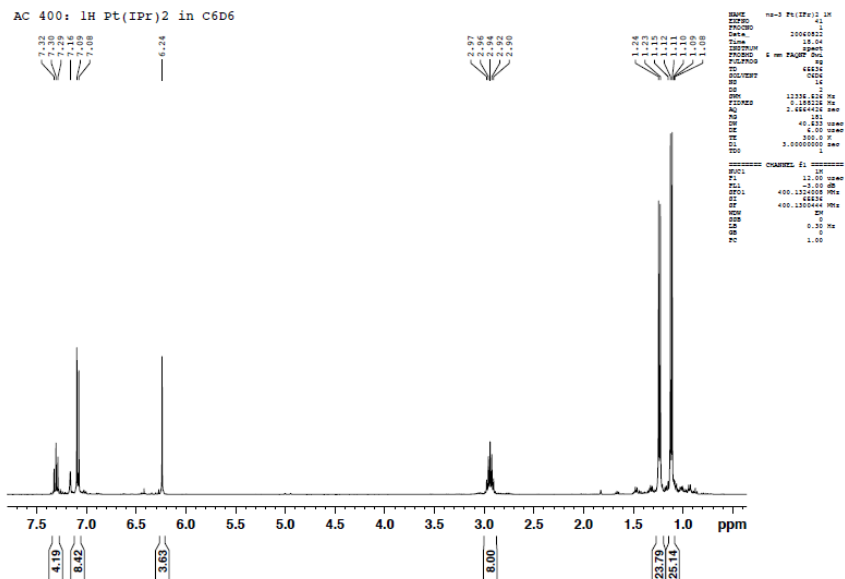

### <sup>13</sup>C NMR

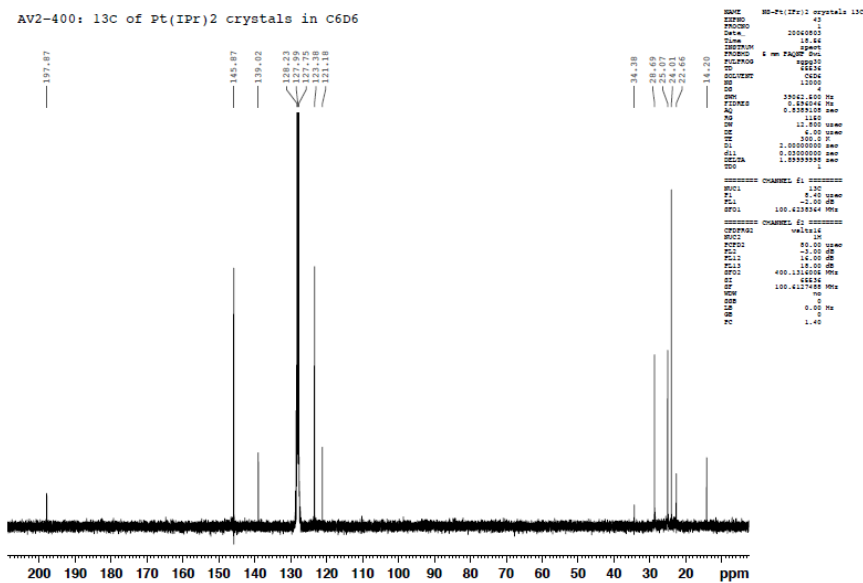



## Buried volume of $Me^iPr$ ligand:

SambVca@Mol.NnaC

SambVca @ Mol.NaC  
Results page

S A M B V C A

Buried Volume in Salerno

<http://www.molnac.unisa.it/OM-tools/SambVca>

L. Cavallo et al. email: lcavallo@unisa.it

**Molecule from input :**

Molecule from input :  
./temp/cfca9b5d4c5c4e16f5302ce5366fa247.c3d1

Number of atoms : 33  
Atom that is coordinated : 1  
Atoms that define the axis : 2  
ID of these atoms : 32 33

Radius of sphere (Angs) : 3.500  
Distance from sphere (Angs) : 2.050  
Mesh step (Angs) : 0.050  
H atoms included in the V<sub>bur</sub> calculation

**Cartesian coordinates from input :**

Cartesian coordinates from input:

|        |         |         |
|--------|---------|---------|
| input# |         |         |
| C      | 3.48700 | 7.74700 |
| C      | 2.65400 | 9.86200 |
| C      | 3.50900 | 9.95900 |
| C      | 3.99400 | 9.95900 |
| C      | 1.57800 |         |

SambVca@Mol.NnaC

|    |       |  |
|----|-------|--|
| H  | 1.729 |  |
| C2 | 1.99  |  |
| C3 | 1.99  |  |
| C  | 1.99  |  |
| N2 | 1.81  |  |
| N3 | 1.81  |  |
| N  | 1.81  |  |
| O  | 1.78  |  |
| F  | 1.72  |  |
| F  | 2.11  |  |
| Cl | 2.05  |  |

**Coordinates scaled to put the metal at the origin**

Coordinates scaled to put the metal at the origin:

|   |          |          |
|---|----------|----------|
| C | -0.15721 | 2.00173  |
| O | 2.22081  | -0.99021 |
| O | 0.48981  | -0.99021 |
| C | 0.42061  | 0.34979  |
| O | 0.44451  | -2.63821 |
| C | -3.54521 | 2.63973  |
| O | 0.67319  | -3.26121 |
| C | 1.82681  | 2.26479  |
| O | 0.19561  | 2.91379  |
| C | 1.57281  | 3.05179  |
| O | 0.88219  | -2.00121 |
| O | 0.54381  | -2.00121 |
| C | 0.43261  | 1.18279  |
| H | -3.85721 | 3.54473  |
| H | 0.46419  | -4.31621 |
| H | 0.75819  | -3.04821 |
| H | 0.51719  | -2.63721 |
| H | 2.50881  | -4.09421 |
| H | 1.87381  | -3.45321 |
| H | 1.98781  | 2.81479  |
| H | 1.90681  | 3.86679  |
| H | 1.50461  | 2.47779  |
| H | 2.19281  |          |

file:///C:/...s/George%20Fortman/Desktop/Nolan/(NCH)2PM62/Xray/Vburr/Equidistance/Pq(dMeIP)2Me2%20with%20H.htm[7/21/2009 1:04:43 PM]  
SambVca@Mol.NnaC

|   |          |          |
|---|----------|----------|
| C | 1.00600  | 7.88900  |
| C | 0.09900  | 8.38500  |
| C | 0.38300  | 8.05600  |
| C | 0.17200  | 5.90900  |
| C | 5.90900  | 8.24400  |
| C | 1.80300  | 6.55800  |
| C | 0.42600  | 6.69600  |
| C | 2.88100  | 1.64300  |
| C | 1.45500  | 4.82700  |
| C | 1.86600  | -0.21300 |
| H | -0.21300 | 9.29000  |
| H | 2.46300  | -0.67200 |
| H | 2.75700  | 0.59600  |
| H | 3.51600  | 1.00700  |
| H | -0.51000 | -0.45000 |
| H | 0.12500  | 0.19100  |
| H | 0.01100  | 6.45900  |
| H | 0.09200  | 7.51100  |
| H | 0.49400  | 6.12200  |
| H | -0.19400 | 6.17700  |
| H | 3.71200  | 7.54600  |
| H | 3.03100  | 6.87300  |
| H | 2.89500  | 2.08900  |
| H | 1.21200  | 0.96000  |
| H | 0.78600  | 1.22000  |
| H | 2.33400  | 5.10800  |
| H | 2.47900  | 5.61900  |
| H | 1.00600  | 4.30000  |
| H | 1.20200  | 1.16000  |
| H | 1.71100  | 5.84100  |
| H | 2.05000  | 2.35200  |
| N | 1.62600  | 4.49100  |
| N | 1.74600  |          |

**Atoms and radius in the parameter file**

Atoms and radius in the parameter file

file:///C:/...s/George%20Fortman/Desktop/Nolan/(NCH)2PM62/Xray/Vburr/Equidistance/Pq(dMeIP)2Me2%20with%20H.htm[7/21/2009 1:04:43 PM]  
SambVca@Mol.NnaC

|    |         |          |
|----|---------|----------|
| H  | 2.53279 | 3.23073  |
| H  | 1.71319 | 3.90179  |
| H  | 1.03219 | 3.28979  |
| H  | 0.59619 | -1.55521 |
| H  | 0.78681 | -2.68421 |
| H  | 1.21281 | -2.42421 |
| H  | 0.33519 | 1.46379  |
| H  | 0.48019 | 1.97479  |
| H  | 0.99281 | 0.65579  |
| H  | 0.79681 | -2.48421 |
| H  | 0.28781 | 2.19679  |
| H  | 0.05119 | -1.29221 |
| N  | 0.37281 | 0.84679  |
| N  | 0.25281 | 0.00000  |
| XX | 0.00000 | 0.00000  |
| XX | 0.00000 | 0.00000  |

**Results : Volumes in Angs^3**

Results : Volumes in Angs^3

|                        |            |          |         |
|------------------------|------------|----------|---------|
| N of voxels examined : | 1436277    |          |         |
| Volume of voxel :      | 0.1295E-03 |          |         |
| V Free                 | V Buried   | V Total  | V Exact |
| 129.419                | 50.119     | 179.538  | 179.534 |
| %V Free                | %V_Bur     | % Tot/Ex |         |
| 72.084                 | 27.916     | 99.967   |         |

The %V\_Bur of your molecule is: 27.9

file:///C:/...s/George%20Fortman/Desktop/Nolan/(NCH)2PM62/Xray/Vburr/Equidistance/Pq(dMeIP)2Me2%20with%20H.htm[7/21/2009 1:04:43 PM] file:///C:/...s/George%20Fortman/Desktop/Nolan/(NCH)2PM62/Xray/Vburr/Equidistance/Pq(dMeIP)2Me2%20with%20H.htm[7/21/2009 1:04:43 PM]







## Buried volume of IPr ligand:

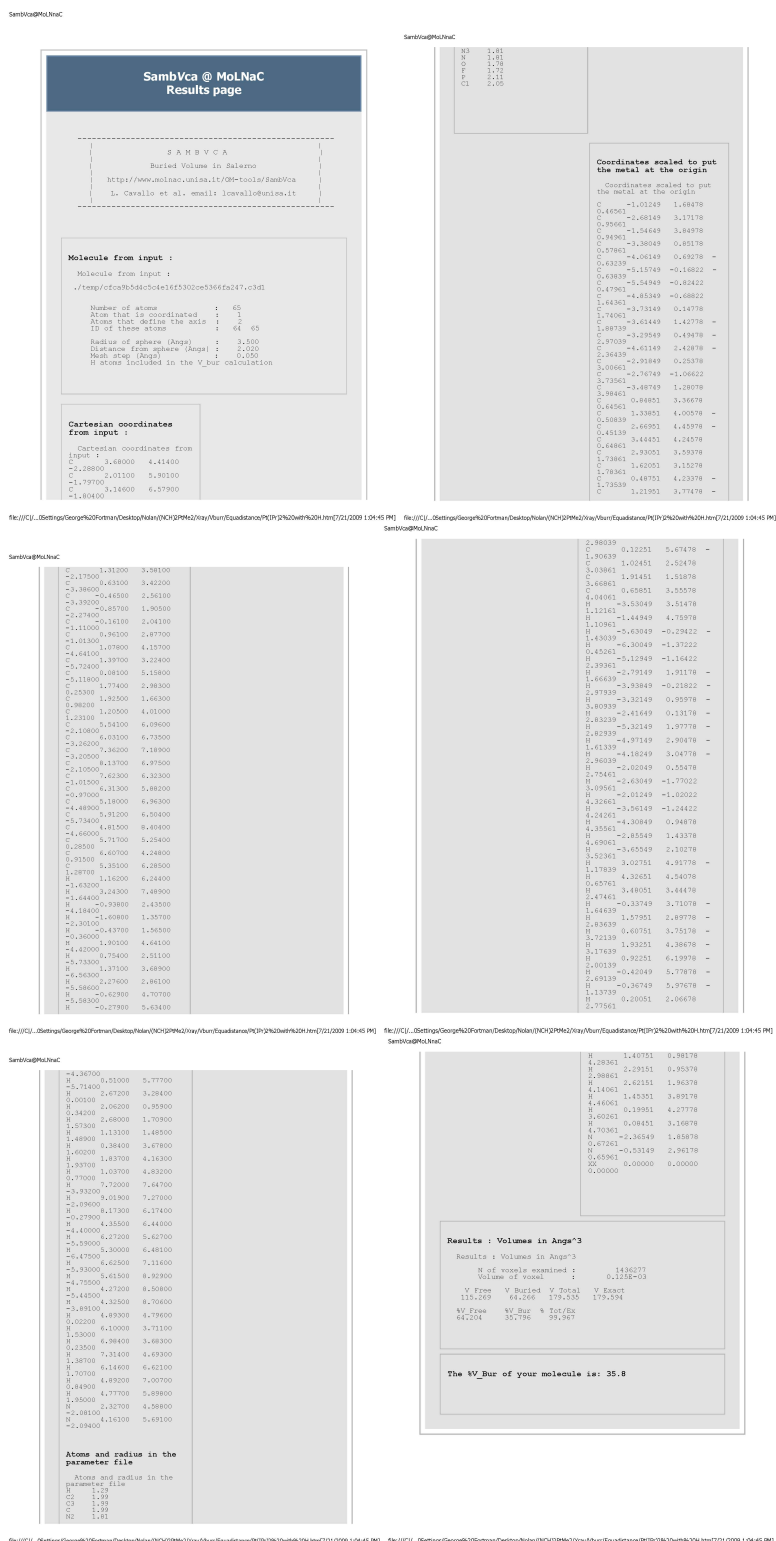

## Buried volume of $nI^tBu$ ligand:

SambVca@Mol.NnaC

**SambVca @ Mol.NaC**  
**Results page**

---

S A M B V C A  
 Buried Volume in Salerno  
<http://www.molnac.unisa.it/OM-tools/SambVca>  
 L. Cavallo et al. email: lcavallo@unisa.it

---

**Molecule from input :**  
 Molecule from input :  
 ./temp/cfca9b5d4c5c4e16f5302ce5366fa247.c3d1

Number of atoms : 33  
 Atom that is coordinated : 1  
 Atoms that define the axis : 2  
 ID of these atoms : 32 33

Radius of sphere (Angs) : 3.500  
 Distance from sphere (Angs) : 2.050  
 Mesh step (Angs) : 0.050  
 H atoms included in the V<sub>bur</sub> calculation

---

**Cartesian coordinates from input :**  
 Cartesian coordinates from input :  
 input : 8.73100 13.72600  
 C 2.77600 7.36900 15.49300  
 C -3.29100 8.63400 15.95100  
 C -3.32000

SambVca@Mol.NnaC

|    |      |  |  |
|----|------|--|--|
| H  | 1.29 |  |  |
| C2 | 1.99 |  |  |
| C3 | 1.99 |  |  |
| C  | 1.99 |  |  |
| N2 | 1.81 |  |  |
| N3 | 1.81 |  |  |
| N  | 1.81 |  |  |
| O  | 1.78 |  |  |
| F  | 1.72 |  |  |
| P  | 2.11 |  |  |
| Cl | 2.05 |  |  |

**Coordinates scaled to put the metal at the origin**  
 Coordinates scaled to put the metal at the origin

|   |          |          |         |
|---|----------|----------|---------|
| C | -0.68465 | 1.83830  | -       |
| O | 0.48197  | -2.04665 | 3.60530 |
| O | 0.39697  | -2.04665 | 3.60530 |
| C | 0.02597  | -0.78165 | 4.06330 |
| O | 0.50297  | 1.52635  | 3.16430 |
| C | 1.36535  | 4.50930  | -       |
| C | 0.09697  | 1.78935  | 3.17030 |
| C | 1.00903  | 2.30735  | 2.05830 |
| C | 1.21997  | -3.30665 | 1.51730 |
| C | 0.56697  | -3.17365 | 0.08030 |
| O | 0.08597  | -3.97565 | 1.84630 |
| C | 1.95397  | -4.18165 | 2.26430 |
| O | 0.44503  | -2.83065 | 4.11030 |
| H | 1.17297  | -0.50465 | 4.95030 |
| H | 1.22297  | 1.57435  | 5.24030 |
| H | 0.57297  | 2.94235  | 4.57530 |
| H | 1.07097  | 1.69935  | 4.57230 |
| H | 2.02497  | 1.51135  | 2.31230 |
| H | 1.39303  | 2.74535  | 3.30730 |
| H | 1.17403  | 1.27735  | 3.89530 |
| H | 1.42603  | 2.10135  | 2.08130 |
| H | 2.17997  |          |         |

file:///C:/.../George%20Fortman/Desktop/Nolan/(NCH)2PMe2/xy/Vbur/Equidistance/Pt(tBu)2Me2%20with%20H.htm[7/21/2009 1:04:46 PM] file:///C:/.../George%20Fortman/Desktop/Nolan/(NCH)2PMe2/xy/Vbur/Equidistance/Pt(tBu)2Me2%20with%20H.htm[7/21/2009 1:04:46 PM]

SambVca@Mol.NnaC

|   |          |          |          |
|---|----------|----------|----------|
| C | 10.94200 | 15.05200 |          |
| C | -2.79700 | 11.38100 | 16.39700 |
| C | -3.39100 | 11.20500 | 15.05800 |
| C | -1.28500 | 11.72300 | 13.94600 |
| C | -3.51400 | 8.10900  | 13.40500 |
| C | -2.86100 | 8.24200  | 11.96800 |
| C | -4.24800 | 5.44000  | 13.43400 |
| C | -1.84900 | 5.23400  | 14.15200 |
| H | 6.58500  | 5.58500  | 15.99800 |
| H | 3.46700  | 8.91100  | 16.83800 |
| H | -3.51700 | 10.39000 | 17.12800 |
| H | -2.86700 | 12.35800 | 16.46300 |
| H | -3.36500 | 11.07500 | 16.46000 |
| H | -4.31900 | 10.92700 | 14.20000 |
| H | -0.90100 | 12.16100 | 15.19500 |
| H | -1.12000 | 10.69300 | 15.78300 |
| H | -0.86800 | 11.51700 | 13.96900 |
| H | -4.47200 | 12.68400 | 14.08700 |
| H | -3.38300 | 11.46700 | 13.07400 |
| H | -3.14600 | 8.60700  | 11.96000 |
| H | -1.47000 | 5.36100  | 11.53900 |
| H | -2.38300 | 6.84500  | 11.47800 |
| H | -2.97700 | 6.00500  | 12.95800 |
| H | -4.89200 | 4.56400  | 12.99800 |
| H | -4.19800 | 5.32700  | 14.36400 |
| H | -4.53700 | 5.12900  | 15.08500 |
| H | -2.13200 | 4.35200  | 13.72500 |
| H | -1.80000 | 5.65900  | 14.12500 |
| H | -0.96600 | 9.46300  | 14.87100 |
| N | -3.00700 | 7.41800  | 14.14100 |
| N | -2.95400 |          |          |

**Atoms and radius in the parameter file**  
 Atoms and radius in the parameter file

SambVca@Mol.NnaC

|         |         |          |          |
|---------|---------|----------|----------|
| H       | 3.26635 | 2.19930  | -        |
| H       | 1.08897 | 2.05135  | 1.18630  |
| H       | 0.85197 | -2.80865 | 0.07230  |
| H       | 0.82403 | -4.05465 | -0.34870 |
| H       | 0.08897 | -2.57065 | -0.40970 |
| H       | 0.68297 | -3.41065 | 1.07030  |
| H       | 2.59797 | -4.85165 | 1.11030  |
| H       | 1.90397 | -4.08865 | 2.47630  |
| H       | 2.24297 | -4.28665 | 3.19730  |
| H       | 0.16203 | -5.06365 | 1.83730  |
| H       | 0.49403 | -3.75665 | 2.23730  |
| H       | 1.32803 | 0.04735  | 2.98330  |
| N       | 0.71297 | -1.99765 | 2.25330  |
| N       | 0.65997 | 0.00000  | 0.00000  |
| XX      | 0.00000 | 0.00000  | 0.00000  |
| 0.00000 |         |          |          |

**Results : Volumes in Angs^3**  
 Results : Volumes in Angs^3  
 N of voxels examined : 1436277  
 Volume of voxel : 0.125E-03

|         |          |         |         |
|---------|----------|---------|---------|
| Y Free  | V Buried | V Total | V Exact |
| 113.085 | 65.449   | 179.535 | 179.534 |
| 62.988  | 37.012   | 99.967  |         |

**The %V\_Bur of your molecule is: 37.0**

file:///C:/.../George%20Fortman/Desktop/Nolan/(NCH)2PMe2/xy/Vbur/Equidistance/Pt(tBu)2Me2%20with%20H.htm[7/21/2009 1:04:46 PM] file:///C:/.../George%20Fortman/Desktop/Nolan/(NCH)2PMe2/xy/Vbur/Equidistance/Pt(tBu)2Me2%20with%20H.htm[7/21/2009 1:04:46 PM]

## Buried volume of <sup>Me</sup>IME:

SambVca@MoLNac

**SambVca @ MoLNac  
Results page**

S A M B V C A  
Buried Volume in Salerno  
<http://www.molnac.unisa.it/CM-tools/SambVca>  
D. Cavallo et al. email: [lcavallo@unisa.it](mailto:lcavallo@unisa.it)

**Molecule from input :**  
Molecule from input :  
./temp/cfca9b5d4c5c4e16f5302ce5366fa247.c3d1

Number of atoms : 21  
Atom that is coordinated : 1  
Atoms that define the axis : 2  
ID of these atoms : 20 21

Radius of sphere (Angs) : 3.500  
Distance from sphere (Angs) : 2.100  
Mesh step (Angs) : 0.050  
H atoms included in the V\_bur calculation

**Cartesian coordinates from input :**

| input   | x       | y       | z |
|---------|---------|---------|---|
| C       | 5.27200 | 1.96000 |   |
| 4.31300 |         |         |   |
| C       | 6.16600 | 4.07200 |   |
| 4.39000 |         |         |   |
| C       | 4.83200 | 4.20200 |   |
| 4.17300 |         |         |   |

SambVca@MoLNac

Coordinates scaled to put the metal at the origin

|         |          |         |   |
|---------|----------|---------|---|
| C       | 0.23819  | 2.08601 | - |
| 0.04297 |          |         |   |
| C       | 1.13219  | 4.19801 | - |
| 0.03403 |          |         |   |
| C       | -0.20181 | 4.32801 | - |
| 0.18497 |          |         |   |
| C       | 2.67719  | 2.23501 | - |
| 0.28903 |          |         |   |
| C       | 2.20619  | 5.22301 | - |
| 0.14303 |          |         |   |
| C       | -1.07981 | 5.53501 | - |
| 0.31297 |          |         |   |
| C       | -2.11881 | 2.71901 | - |
| 0.49697 |          |         |   |
| H       | 3.25919  | 2.49501 | - |
| 0.45397 |          |         |   |
| H       | 3.06819  | 2.54101 | - |
| 1.13503 |          |         |   |
| H       | 2.58519  | 1.25801 | - |
| 0.30703 |          |         |   |
| H       | 1.80219  | 6.11501 | - |
| 0.18803 |          |         |   |
| H       | 2.73219  | 5.06101 | - |
| 0.95403 |          |         |   |
| H       | 2.78019  | 5.16901 | - |
| 0.64197 |          |         |   |
| H       | -0.54281 | 6.34401 | - |
| 0.18497 |          |         |   |
| H       | -1.48681 | 5.54901 | - |
| 1.20497 |          |         |   |
| H       | -1.78481 | 5.50101 | - |
| 0.36603 |          |         |   |
| H       | -2.23181 | 1.74701 | - |
| 0.53697 |          |         |   |
| H       | -2.67381 | 3.08301 | - |
| 0.22503 |          |         |   |
| H       | -2.39281 | 3.11601 | - |
| 1.34997 |          |         |   |
| H       | 1.38419  | 2.83301 | - |
| 0.11803 |          |         |   |
| H       | -0.71381 | 3.03801 | - |
| 0.23897 |          |         |   |
| %V      | 0.00000  | 0.00000 |   |
| 0.00000 |          |         |   |

**Results : Volumes in Angs^3**

Results : Volumes in Angs^3

| N of voxels examined | Volume of voxel | V Free  | V Buried | V Total | V Exact |
|----------------------|-----------------|---------|----------|---------|---------|
| 1436277              | 0.1225E+03      | 133.833 | 45.702   | 179.535 | 179.594 |

%V\_Free    %V\_Bur    % Tot/Ex

file:///C:/...ings/George%20Fortman/Desktop/Nolan/(NCH)2PM2/xy/Vbur/Equidistance/Pt[1Me]2Me%20with%20H.htm[7/21/2009 1:04:46 PM] SambVca@MoLNac

|         |         |         |  |
|---------|---------|---------|--|
| C       | 7.71100 | 2.10900 |  |
| 4.64500 |         |         |  |
| C       | 7.24000 | 5.09700 |  |
| 4.49900 |         |         |  |
| C       | 3.95400 | 5.40900 |  |
| 4.04300 |         |         |  |
| C       | 2.91500 | 2.59300 |  |
| 3.85900 |         |         |  |
| H       | 8.29300 | 2.36900 |  |
| 3.90200 |         |         |  |
| H       | 8.10200 | 2.41500 |  |
| 5.49100 |         |         |  |
| H       | 7.61900 | 1.13200 |  |
| 4.66300 |         |         |  |
| H       | 6.83600 | 5.98900 |  |
| 4.54400 |         |         |  |
| H       | 7.76600 | 4.93500 |  |
| 5.31000 |         |         |  |
| H       | 7.82400 | 5.04300 |  |
| 3.71400 |         |         |  |
| H       | 4.49100 | 6.21800 |  |
| 4.17100 |         |         |  |
| H       | 3.54700 | 5.42300 |  |
| 3.15100 |         |         |  |
| H       | 3.24900 | 5.37500 |  |
| 4.72200 |         |         |  |
| H       | 2.80200 | 1.62100 |  |
| 3.81900 |         |         |  |
| H       | 2.36000 | 2.85700 |  |
| 4.58100 |         |         |  |
| H       | 2.64100 | 2.99000 |  |
| 3.00600 |         |         |  |
| N       | 6.41800 | 2.70700 |  |
| 4.47400 |         |         |  |
| N       | 4.32000 | 2.91200 |  |
| 4.11700 |         |         |  |

**Atoms and radius in the parameter file**

Atoms and radius in the parameter file

|    |      |
|----|------|
| H  | 1.29 |
| C2 | 1.99 |
| C3 | 1.99 |
| C  | 1.99 |
| N2 | 1.81 |
| N3 | 1.81 |
| N  | 1.81 |
| O  | 1.78 |
| P  | 1.72 |
| Cl | 2.11 |
|    | 2.05 |

Coordinates scaled to put the metal at the origin

SambVca@MoLNac

|        |        |        |
|--------|--------|--------|
| 74.544 | 25.456 | 99.967 |
|--------|--------|--------|

The %V\_Bur of your molecule is: 25.5

file:///C:/...ings/George%20Fortman/Desktop/Nolan/(NCH)2PM2/xy/Vbur/Equidistance/Pt[1Me]2Me%20with%20H.htm[7/21/2009 1:04:46 PM] SambVca@MoLNac

## Buried volume of $at^1Bu$ ligand:

SambVca@Mol.NnaC

SambVca Results for MeIPr in cis-Pt(MeIPr)2Me2 (1)

**SambVca @ Mol.NnaC  
Results page**

---

S A M B V C A  
Buried Volume in Salerno  
http://www.molnac.unisa.it/CM-tools/SambVca  
L. Cavallo et al. email: lcavallo@unisa.it

---

**Molecule from input :**  
 Molecule from input :  
 ./temp/fad3e8cbbf91d363bb5af2ecbe9904a.c3d1

Number of atoms : 33  
 Atom that is coordinated : 1  
 Atoms that define the axis : 2  
 ID of these atoms : 32 33  
 Radius of sphere (Angs) : 3.500  
 Distance from sphere (Angs) : 2.040  
 Mesh step (Angs) : 0.050  
 H atoms included in the  $V_{bur}$  calculation

**Cartesian coordinates from input :**  
 Cartesian coordinates from input :  
 input : 3.48700 7.74700  
 C 1.77800 2.65400 9.86200  
 C 1.50900 3.99400 9.35900  
 C 1.57800

file:///C:/Documents and Settings/George Fortman/Desktop/Nolan/(NCH)2PM2/Xray/Vbur/atlBu-standard.htm(8/7/2009 10:28:05 AM)  
 SambVca@Mol.NnaC

|   |         |          |
|---|---------|----------|
| C | 7.55000 | 15.35000 |
| H | 5.62200 | 8.28400  |
| C | 6.79400 | 8.17300  |
| C | 4.27400 | 7.51900  |
| C | 5.79800 | 15.28500 |
| C | 5.79600 | 2.36300  |
| C | 7.29000 | 1.61600  |
| C | 5.30100 | 2.37000  |
| C | 4.99200 | 5.06500  |
| H | 5.83700 | 3.85200  |
| H | 5.32800 | 7.84800  |
| H | 7.63200 | 9.21300  |
| H | 6.80000 | 8.26000  |
| H | 6.70800 | 8.02000  |
| H | 4.07300 | 9.13600  |
| H | 4.30500 | 7.76200  |
| H | 3.57700 | 7.02600  |
| H | 5.05300 | 8.43500  |
| H | 5.81000 | 7.07300  |
| H | 6.64200 | 2.55900  |
| H | 7.78000 | 1.43500  |
| H | 7.45800 | 2.96600  |
| H | 7.59300 | 1.80600  |
| H | 4.35900 | 0.69200  |
| H | 5.39000 | 1.73900  |
| H | 5.83300 | 3.01200  |
| H | 5.29500 | 1.45700  |
| H | 5.12500 | 2.51400  |
| H | 4.04000 | 6.16000  |
| N | 5.61300 | 3.98400  |
| N | 5.61200 | 14.81900 |

**Atoms and radius in the parameter file**  
 Atoms and radius in the parameter file

file:///C:/Documents and Settings/George Fortman/Desktop/Nolan/(NCH)2PM2/Xray/Vbur/atlBu-standard.htm(8/7/2009 4:59:08 PM)

SambVca@Mol.NnaC

|    |      |  |
|----|------|--|
| H  | 1.29 |  |
| C2 | 1.99 |  |
| C3 | 1.99 |  |
| C  | 1.99 |  |
| N2 | 1.81 |  |
| N3 | 1.81 |  |
| N  | 1.81 |  |
| O  | 1.78 |  |
| F  | 1.72 |  |
| SI | 2.45 |  |
| P  | 2.11 |  |
| S  | 2.10 |  |
| Cl | 2.05 |  |

**Coordinates scaled to put the metal at the origin**  
 Coordinates scaled to put the metal at the origin

|   |          |         |
|---|----------|---------|
| C | -1.90611 | 3.77389 |
| C | -1.16611 | 1.63689 |
| C | -2.54511 | 1.70789 |
| C | 0.67989  | 3.54189 |
| C | 1.31389  | 2.91289 |
| C | 1.20289  | 3.20389 |
| C | 0.54889  | 5.06689 |
| C | -4.40611 | 3.47689 |
| C | -4.60711 | 3.71189 |
| C | -5.35411 | 2.39889 |
| C | -4.60011 | 4.76589 |
| C | -1.90511 | 4.71589 |
| H | -3.11811 | 0.95789 |
| H | 0.87789  | 3.17689 |
| H | 2.24289  | 3.21889 |
| H | 1.56790  | 1.28989 |
| H | 1.47590  | 1.04989 |
| H | 1.15910  | 2.25689 |
| H | 0.92710  | 2.16589 |
| H | 1.65510  | 0.79189 |

file:///C:/Documents and Settings/George Fortman/Desktop/Nolan/(NCH)2PM2/Xray/Vbur/atlBu-standard.htm(8/7/2009 4:59:08 PM)

SambVca@Mol.NnaC

|    |         |          |
|----|---------|----------|
| H  | 0.05589 | 5.47089  |
| H  | 0.17910 | 1.46489  |
| H  | 0.57790 | 0.10289  |
| H  | 1.40990 | -4.41111 |
| H  | 2.54790 | -5.53511 |
| H  | 2.22590 | -4.00411 |
| H  | 2.36900 | -5.16411 |
| H  | 0.87310 | -6.27811 |
| H  | 0.15790 | -5.23111 |
| H  | 0.60090 | -3.95811 |
| H  | 0.06290 | -5.51311 |
| H  | 0.10710 | -4.45611 |
| H  | 1.19210 | -0.81011 |
| N  | 0.38090 | -2.98611 |
| N  | 0.37990 | 0.00000  |
| XZ | 0.00000 | 0.00000  |

**Results : Volumes in Angs^3**  
 Results : Volumes in Angs^3  
 N of voxels examined : 1436277  
 Volume of voxel : 0.125E-03

| V Free  | V Buried | V Total | V Exact |
|---------|----------|---------|---------|
| 126.821 | 52.714   | 179.535 | 179.594 |

| %V Free | %V Bur | % Tot/Ex |
|---------|--------|----------|
| 70.639  | 29.361 | 99.967   |

**The  $V_{bur}$  of your molecule is: 29.4**

file:///C:/Documents and Settings/George Fortman/Desktop/Nolan/(NCH)2PM2/Xray/Vbur/atlBu-standard.htm(8/7/2009 4:59:08 PM)

References:

- [1] N. Kuhn, T. Kratz, *Synthesis* **1993**, 1993, 561.
- [2] A. J. Arduengo, R. Krafczyk, R. Schmutzler, H. A. Craig, J. R. Goerlich, W. J. Marshall, M. Unverzagt, *Tetrahedron* **1999**, 55, 14523.
- [3] L. Jafarpour, E. D. Stevens, S. P. Nolan, *Journal of Organometallic Chemistry* **2000**, 606, 49.
- [4] N. M. Scott, R. Dorta, E. D. Stevens, A. Correa, L. Cavallo, S. P. Nolan, *Journal of the American Chemical Society* **2005**, 127, 3516.
- [5] Reactivity of IMes depends on the source of Platinum-dimethyl precursor used. Reactions run with non-commercial (COD)Pt(Me)<sub>2</sub> gave faster conversion of complex **4** to **5**. More detailed discussion and possible causes are now being investigated.
- [6] *SAINTE* and *SADABS*, **2007**, Bruker AXS Inc., Madison, Wisconsin, USA.
- [7] *SHELX97*, G. M. Sheldrick, *Acta Crystallogr. Sect. A*, **2008**, 64, 112-122.
- [8] H. D. Flack, *Acta Crystallogr. Sect. A*, **1983**, 39, 876-881.
- [9] F. L. Hirshfeld, *Acta Crystallogr. Sect. A*, **1976**, 32, 239-244.

**Table S2.** Summary of crystallographic data for complexes **1-7**

| Complex                                            | <b>1</b>                                                                                            | <b>2</b>                                                                                           | <b>3</b>                                                                                          | <b>4</b>                                                                                            | <b>5</b>                                                                                          | <b>6</b>                                                                                           | <b>7</b>                                                                                            |
|----------------------------------------------------|-----------------------------------------------------------------------------------------------------|----------------------------------------------------------------------------------------------------|---------------------------------------------------------------------------------------------------|-----------------------------------------------------------------------------------------------------|---------------------------------------------------------------------------------------------------|----------------------------------------------------------------------------------------------------|-----------------------------------------------------------------------------------------------------|
| Chemical Formula                                   | C <sub>16</sub> H <sub>30</sub> N <sub>4</sub> Pt                                                   | C <sub>32</sub> H <sub>54</sub> N <sub>4</sub> Pt<br>+ CH <sub>2</sub> Cl <sub>2</sub>             | C <sub>24</sub> H <sub>46</sub> N <sub>4</sub> Pt                                                 | C <sub>44</sub> H <sub>54</sub> N <sub>4</sub> Pt                                                   | C <sub>43</sub> H <sub>50</sub> N <sub>4</sub> Pt                                                 | C <sub>54</sub> H <sub>72</sub> N <sub>4</sub> Pt                                                  | C <sub>24</sub> H <sub>46</sub> N <sub>4</sub> Pt                                                   |
| Formula Weight (M)                                 | 473.44                                                                                              | 774.81                                                                                             | 585.74                                                                                            | 834.00                                                                                              | 817.96                                                                                            | 972.25                                                                                             | 585.74                                                                                              |
| Crystal system                                     | monoclinic                                                                                          | monoclinic                                                                                         | monoclinic                                                                                        | monoclinic                                                                                          | monoclinic                                                                                        | monoclinic                                                                                         | monoclinic                                                                                          |
| Unit-cell dimensions, V <sub>cell</sub>            | a=14.8926(2) Å<br>b=8.1788(1) Å<br>c=16.1119(2) Å<br>β=113.5403(8)°<br>V= 1799.17(4) Å <sup>3</sup> | a=15.5185(7) Å<br>b=12.9037(2) Å<br>c=17.4636(8) Å<br>β=105.354(1)°<br>V= 3372.2(3) Å <sup>3</sup> | a=15.9482(6) Å<br>b=9.6101(3) Å<br>c=17.6283(6) Å<br>β=105.619(1)°<br>V= 2601.0(2) Å <sup>3</sup> | a=16.7156(10) Å<br>b=13.1785(8) Å<br>c=17.6422(10) Å<br>β=99.411(1)°<br>V= 3834.0(4) Å <sup>3</sup> | a=10.7787(5) Å<br>b=20.0707(9) Å<br>c=17.2875(8) Å<br>β=91.064(1)°<br>V= 3739.3(3) Å <sup>3</sup> | a=12.8035(7) Å<br>b=26.9007(16) Å<br>c=14.1517(8) Å<br>β=92.184(1)°<br>V= 4870.6(5) Å <sup>3</sup> | a=12.0260(9) Å<br>b=14.6685(11) Å<br>c=14.7642(10) Å<br>β=91.103(1)°<br>V= 2604.0(3) Å <sup>3</sup> |
| Temperature                                        | 160(1) K                                                                                            | 150(2) K                                                                                           | 150(2) K                                                                                          | 150(2) K                                                                                            | 150(2) K                                                                                          | 150(2) K                                                                                           | 173(2)                                                                                              |
| Space group                                        | P2 <sub>1</sub> /n                                                                                  | Cc                                                                                                 | P2 <sub>1</sub> /c                                                                                | P2 <sub>1</sub> /n                                                                                  | P2 <sub>1</sub> /n                                                                                | P2 <sub>1</sub> /n                                                                                 | P2 <sub>1</sub> /n                                                                                  |
| Formula units/unit cell (Z)                        | 4                                                                                                   | 4                                                                                                  | 4                                                                                                 | 4                                                                                                   | 4                                                                                                 | 4                                                                                                  | 4                                                                                                   |
| N <sub>ref</sub> (measured)                        | 50417                                                                                               | 27974                                                                                              | 41062                                                                                             | 40209                                                                                               | 53108                                                                                             | 63794                                                                                              | 31831                                                                                               |
| N <sub>ref</sub> (independent)                     | 5253                                                                                                | 10221                                                                                              | 7606                                                                                              | 11107                                                                                               | 9017                                                                                              | 10593                                                                                              | 6239                                                                                                |
| R <sub>int</sub>                                   | 0.0753                                                                                              | 0.0195                                                                                             | 0.0336                                                                                            | 0.0373                                                                                              | 0.0706                                                                                            | 0.0478                                                                                             | 0.0706                                                                                              |
| 2θ <sub>max</sub>                                  | 60.0                                                                                                | 61.0                                                                                               | 60.0                                                                                              | 60.0                                                                                                | 56.0                                                                                              | 54.0                                                                                               | 56.0                                                                                                |
| R <sub>F</sub> <sup>2</sup>                        | 0.0439                                                                                              | 0.0252                                                                                             | 0.0223                                                                                            | 0.0420                                                                                              | 0.0548                                                                                            | 0.0584                                                                                             | 0.0584                                                                                              |
| R <sub>F</sub> <sup>2</sup> (I > 2σ <sub>I</sub> ) | 0.0375                                                                                              | 0.0196                                                                                             | 0.0187                                                                                            | 0.0312                                                                                              | 0.0422                                                                                            | 0.0475                                                                                             | 0.0325                                                                                              |
| CCDC no.                                           | 741809                                                                                              | 741810                                                                                             | 741808                                                                                            | 741811                                                                                              | 741812                                                                                            | 741813                                                                                             | 756172                                                                                              |
